# Supplementary material for: Unlocking the value of food waste: sustainable production of ethylene glycol over low-cost Ni–W catalysts supported on glucose-derived carbons
Source: Royal Society of Chemistry journal article supplement (doi:10.1039/d4se00823e), 2024-01-01
Supplement: d4se00823e1.pdf [file d4se00823e1.pdf]

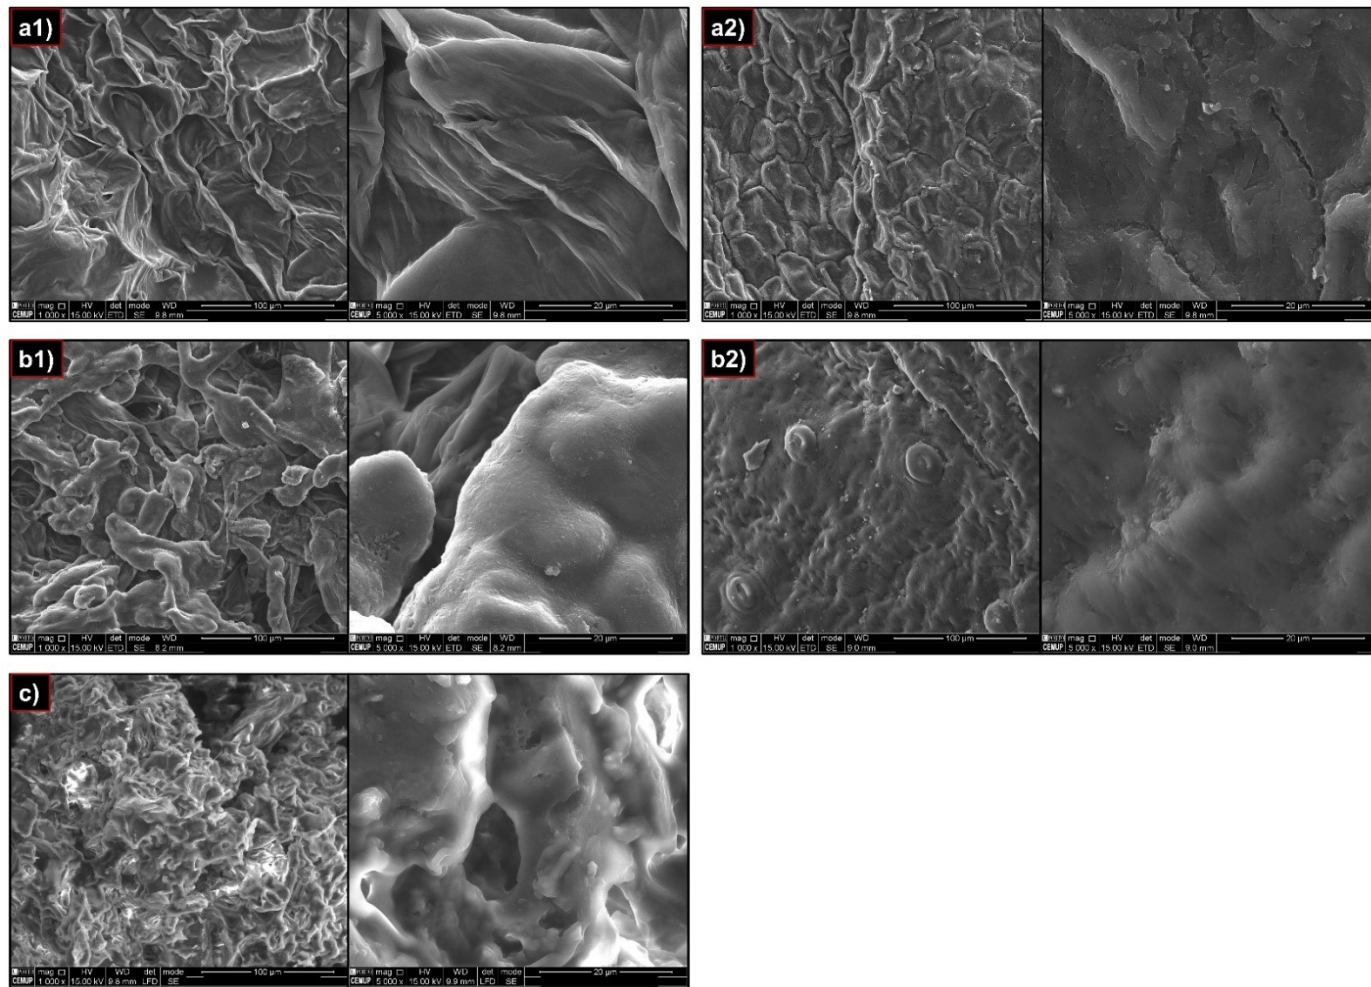

20

21 *Figure S.1 – SEM images of the untreated food wastes ( $\times 1000$  and  $\times 5000$  magnifications): a) banana peel, b) orange peel and c) spent coffee grounds. In images a) and b),*

22

*the numbers 1 and 2 correspond to the inner and outer sides of the fruit peel, respectively.*

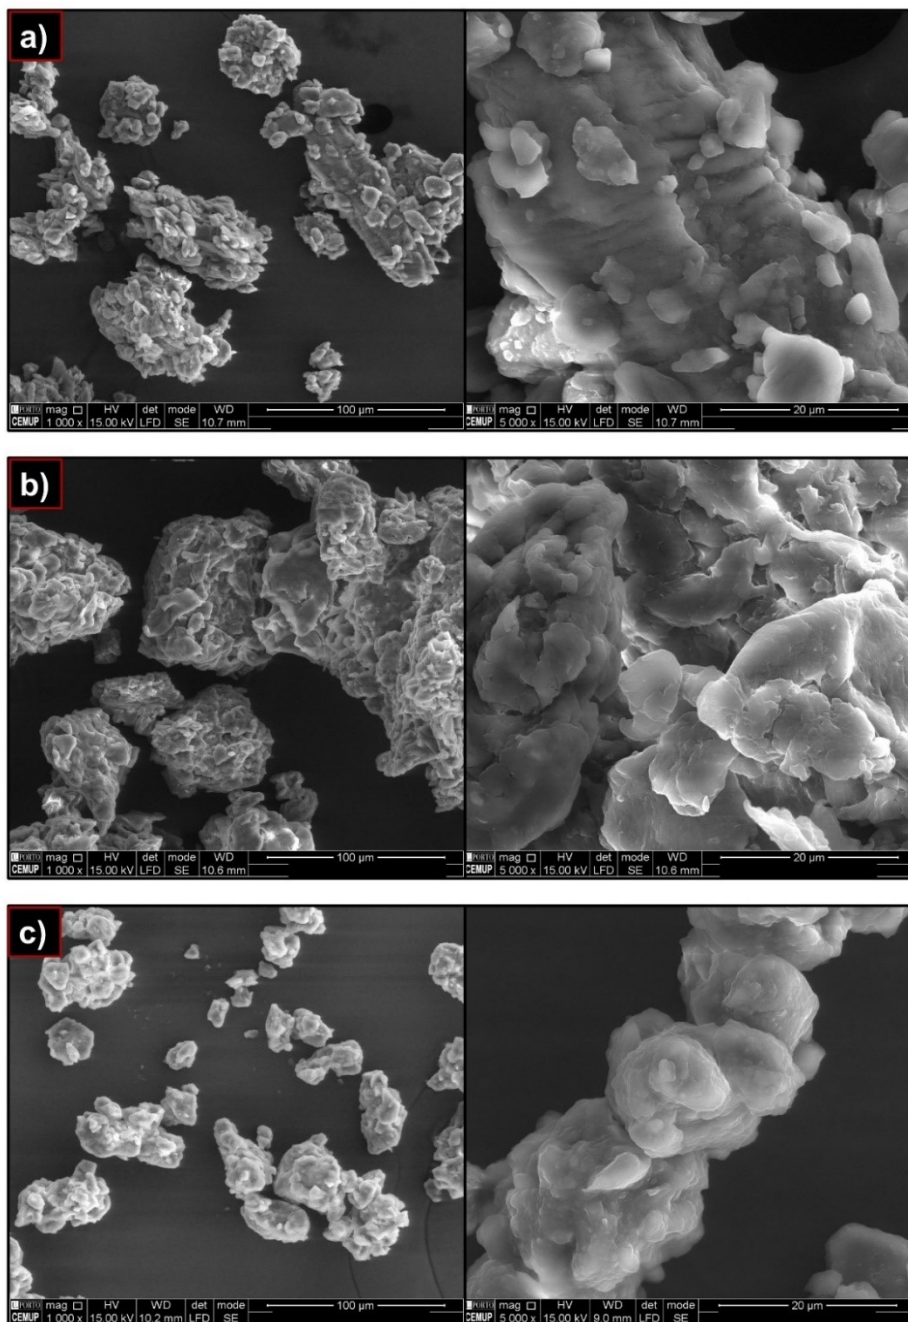

23

24 *Figure S.2 – SEM images of the ball-milled wastes ( $\times 1000$  and  $\times 5000$  magnifications): a) banana peel,*

25

*b) orange peel and c) spent coffee grounds.*

26

## 27 **2. Characterization of catalysts**

### 28 *2.1. Textural properties*

29 The  $N_2$  adsorption-desorption isotherms of the synthesized Ni-W catalysts supported on glucose-derived

30 carbons are shown in Figure S.3.

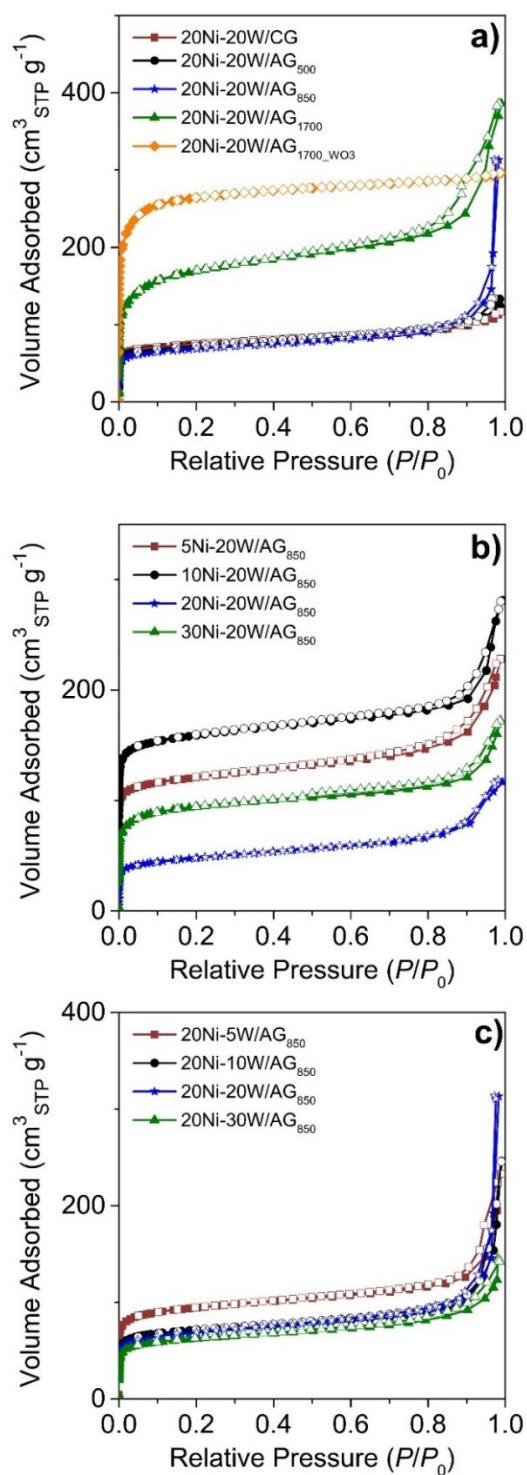

31

32

Figure S.3 –  $N_2$  adsorption-desorption isotherms of the Ni-W catalysts.

33

### 34 2.2. Microscopy

35 The SEM images and EDS results of the synthesized Ni-W catalysts supported on glucose-derived carbons

36 are presented in Figure S.4 and Figure S.5, respectively, while the elemental mapping is displayed in Figure

37 S.6.

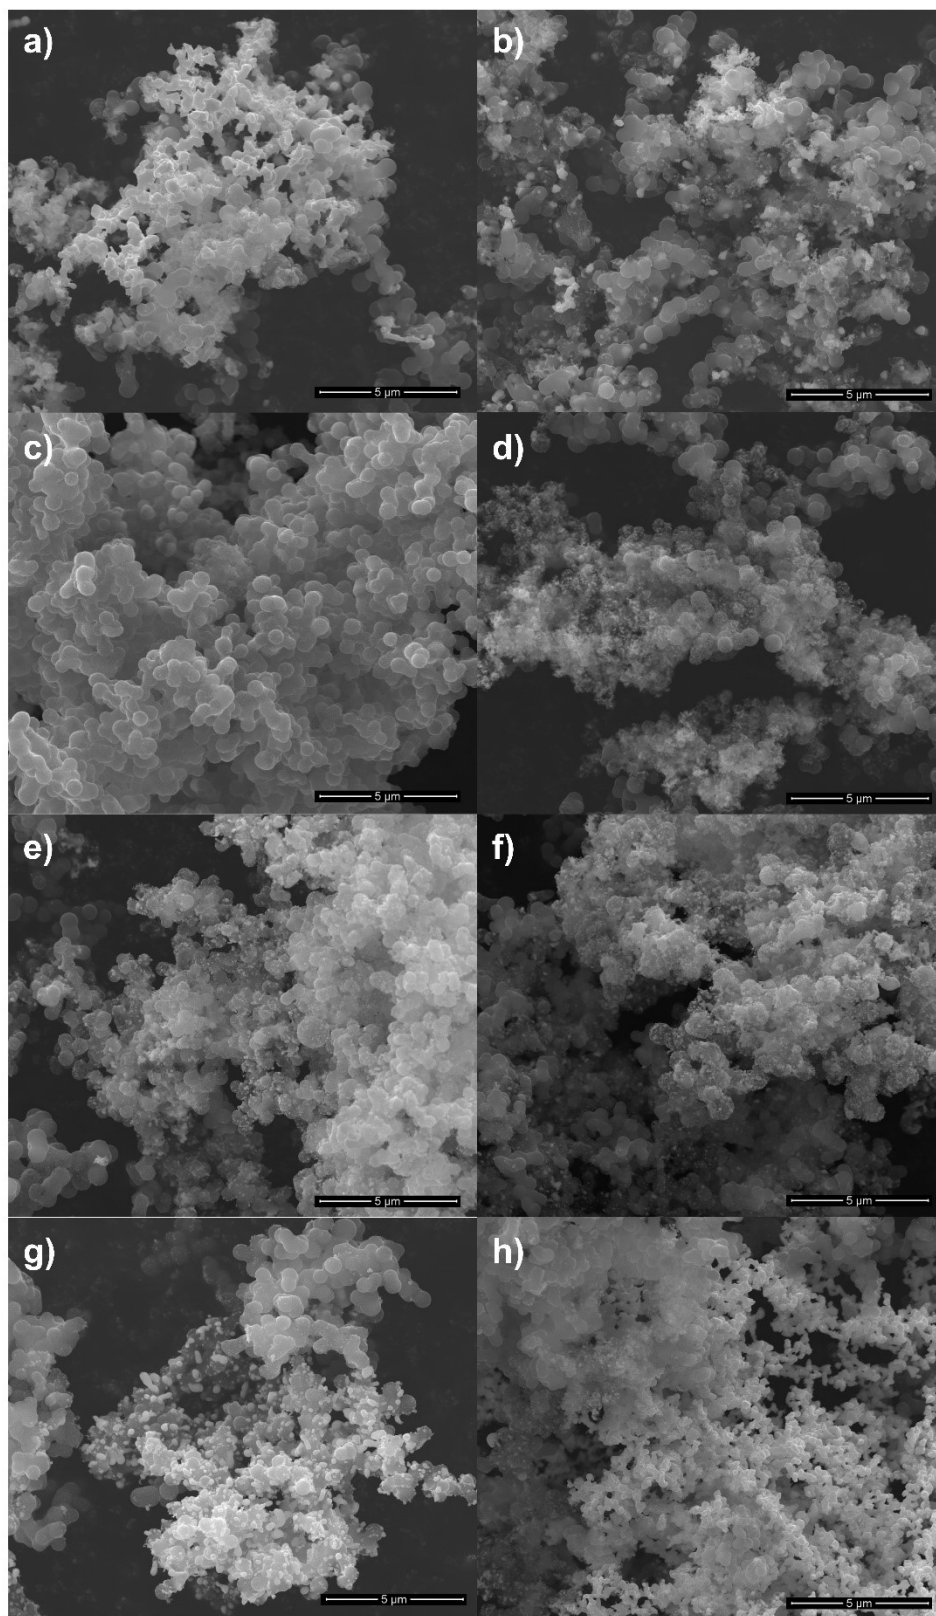

38

39 *Figure S.4 – SEM images of a) 20Ni-20W/CG, b) 20Ni-20W/AG<sub>500</sub>, c) 20Ni-20W/AG<sub>1700</sub>, d) 5Ni-*

40 *20W/AG<sub>850</sub>, e) 10Ni-20W/AG<sub>850</sub>, f) 20Ni-20W/AG<sub>850</sub>, g) 30Ni-20W/AG<sub>850</sub> and h) 20Ni-10W/AG<sub>850</sub>.*

41

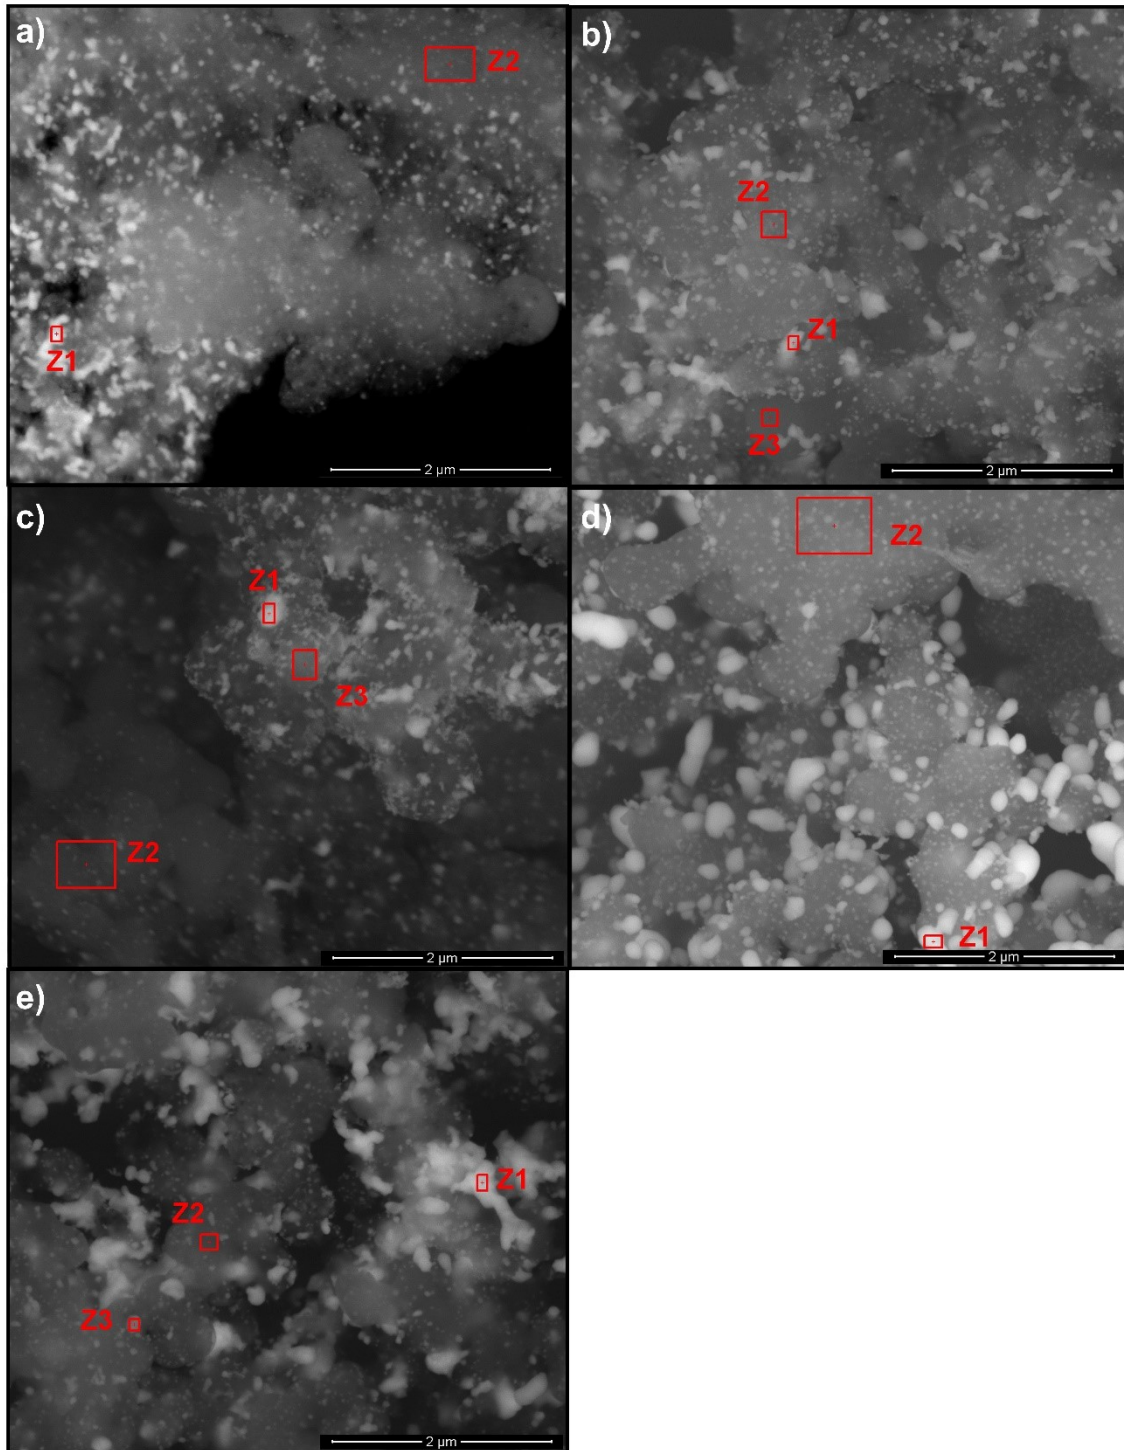

42

43 *Figure S.5 – BSED micrographs of a) 5Ni-20W/AG<sub>850</sub>, b) 10Ni-20W/AG<sub>850</sub>, c) 20Ni-20W/AG<sub>850</sub>, d) 30Ni-*

44

*20W/AG<sub>850</sub> and e) 20Ni-10W/AG<sub>850</sub>.*

45

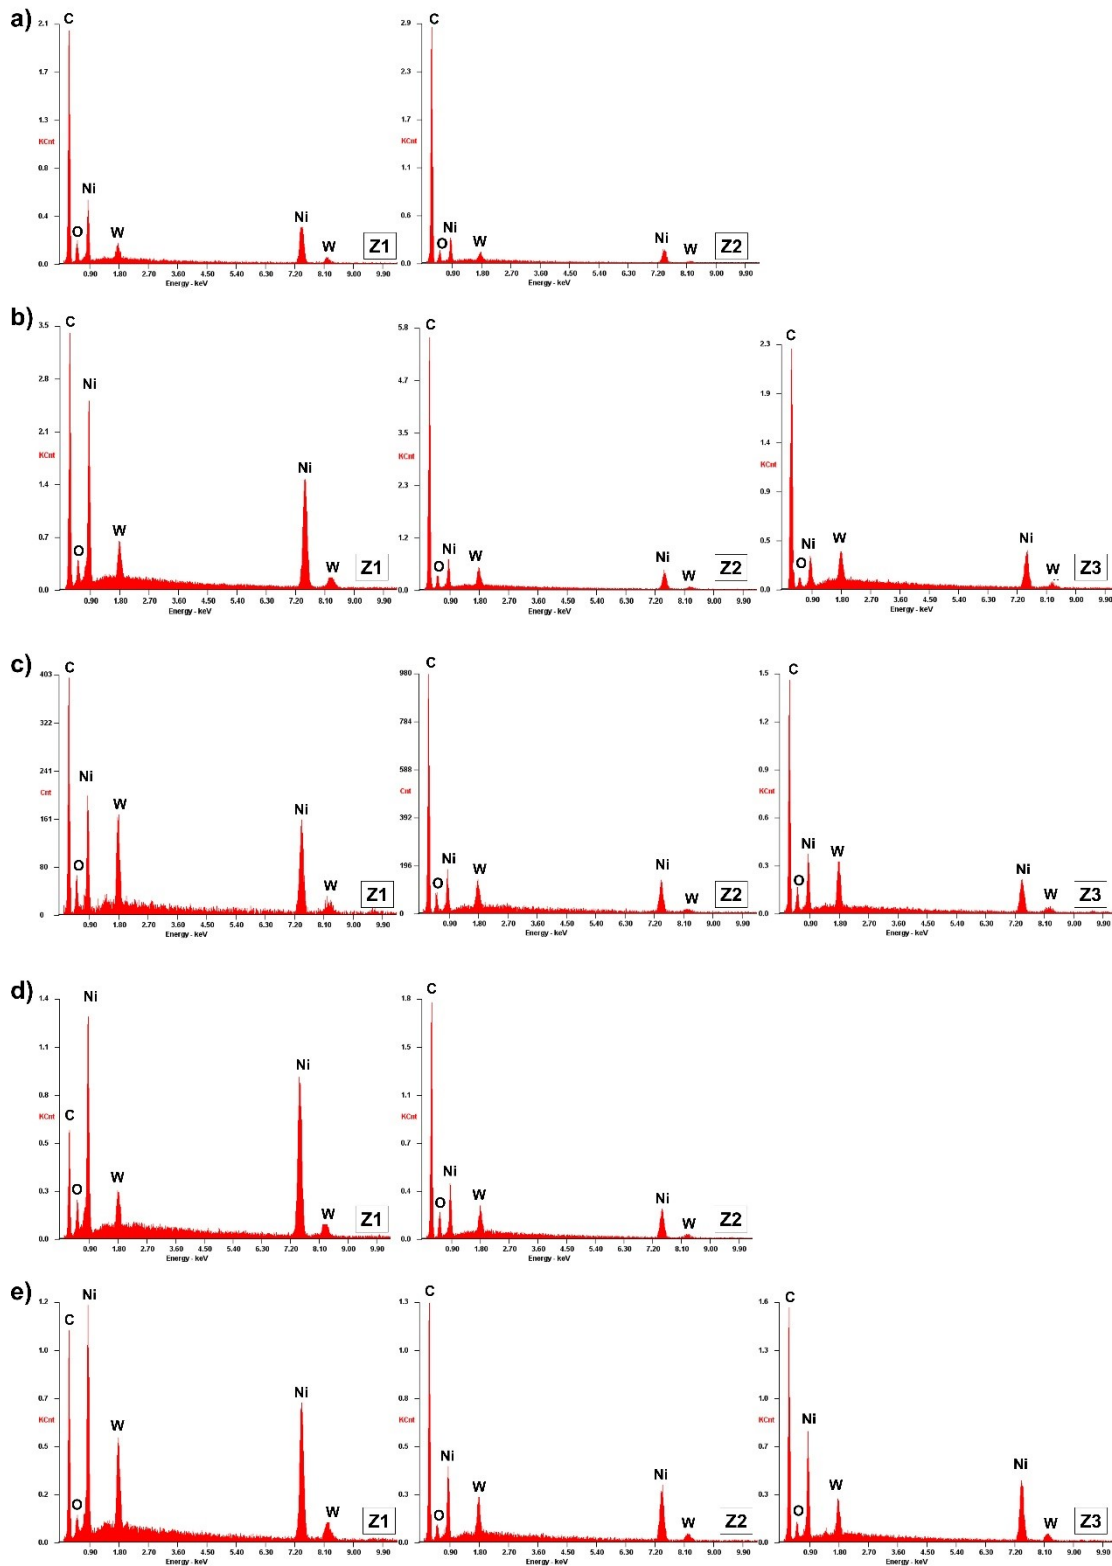

46

47 *Figure S.6 – EDS analysis of a) 5Ni-20W/AG<sub>850</sub>, b) 10Ni-20W/AG<sub>850</sub>, c) 20Ni-20W/AG<sub>850</sub>, d) 30Ni-*

48 *20W/AG<sub>850</sub> and e) 20Ni-10W/AG<sub>850</sub>. [The respective zones are displayed in Figure S.5]*

49

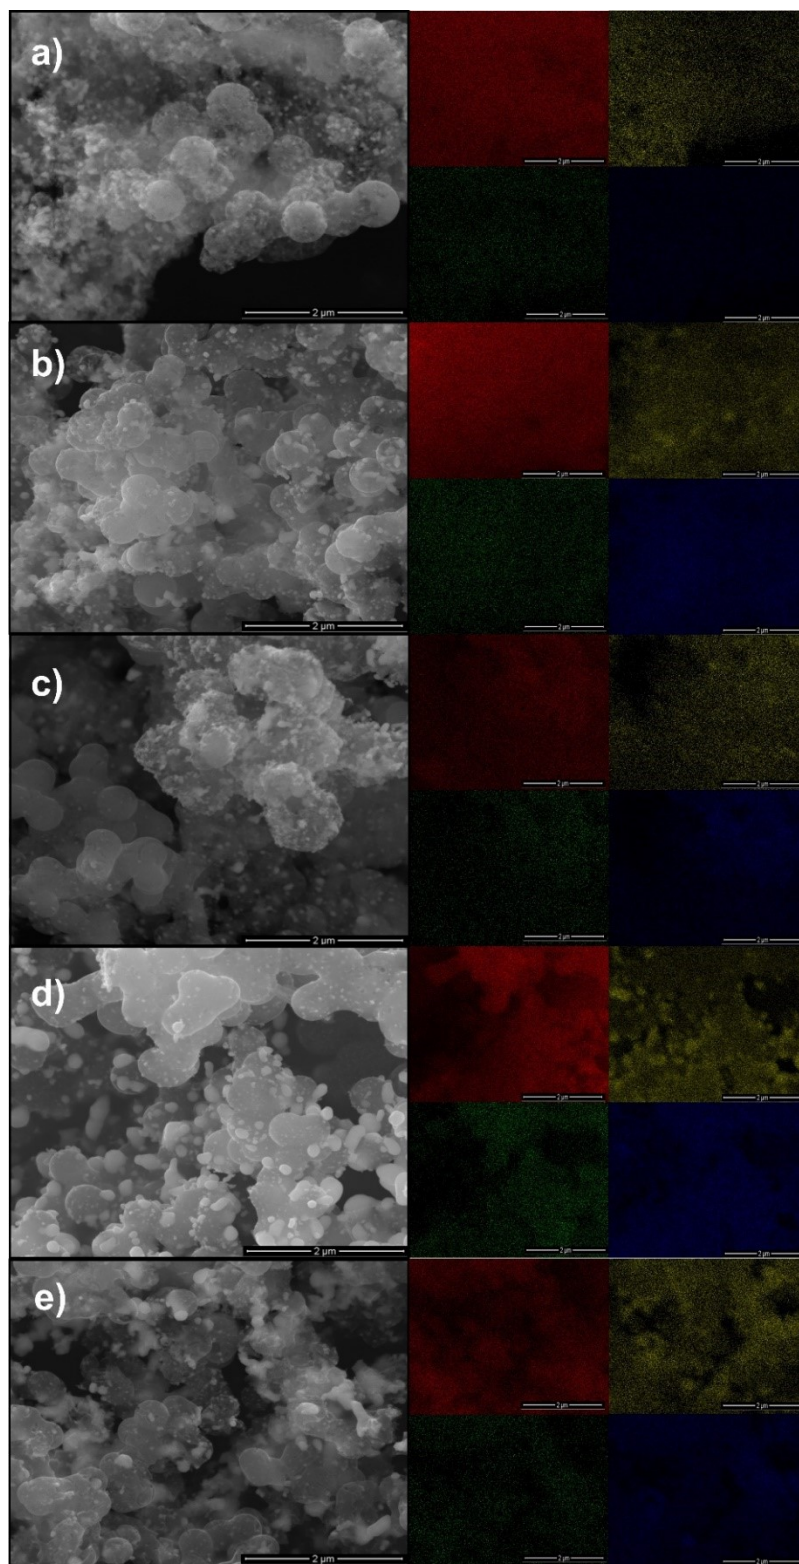

50

51 *Figure S.7 – Elemental mapping of a) 5Ni-20W/AG<sub>850</sub>, b) 10Ni-20W/AG<sub>850</sub>, c) 20Ni-20W/AG<sub>850</sub>, d) 30Ni-*  
 52 *20W/AG<sub>850</sub> and e) 20Ni-10W/AG<sub>850</sub>. C (red), O (green), Ni (yellow) and W (blue) are represented in the*  
 53 *elemental maps given.*



54 **3. Catalytic tests**

55 Table S.1 displays the results obtained in four additional tests: 1) using the support without the addition of the metal phase (AG<sub>850</sub>), 2) using a monometallic Ni catalyst, 3) using  
 56 a monometallic W catalyst, and 4) using a physical mixture of two monometallic Ni and W catalysts.

57

58

*Table S.1 – Catalytic results of cellulose conversion and yield of products<sup>[a]</sup>.*

| Entry | Catalyst                                                      | X (%) | Yields ± 1.7 <sup>[b]</sup> (%) |     |      |     |     |     |     |     |      |        |
|-------|---------------------------------------------------------------|-------|---------------------------------|-----|------|-----|-----|-----|-----|-----|------|--------|
|       |                                                               |       | EG                              | PG  | SOR  | THR | ERY | GLY | FA  | DHA | HA   | Others |
| 1     | AG <sub>850</sub>                                             | 93    | 7.8                             | 2.5 | 1.5  | 0.0 | 0.0 | 3.9 | 1.5 | 0.0 | 0.0  | 75.8   |
| 2     | 20Ni/AG <sub>850</sub>                                        | 100   | 12.5                            | 3.3 | 32.9 | 1.1 | 2.4 | 5.4 | 0.0 | 7.2 | 2.3  | 32.9   |
| 3     | 10W/AG <sub>850</sub>                                         | 100   | 35.1                            | 0.0 | 1.6  | 0.0 | 0.0 | 8.2 | 0.0 | 0.1 | 12.4 | 42.6   |
| 4     | 20Ni/AG <sub>850</sub> + 10W/AG <sub>850</sub> <sup>[c]</sup> | 100   | 47.2                            | 2.3 | 7.8  | 0.9 | 1.2 | 4.0 | 0.5 | 0.1 | 5.5  | 30.5   |

[a] Reaction conditions: 750 mg ball-milled cellulose, 300 mg catalyst, 300 mL H<sub>2</sub>O, 205 °C, 50 bar H<sub>2</sub>, 300 rpm, 5 h.

[b] EG: ethylene glycol; PG: propylene glycol; SOR: sorbitol; THR: threitol; ERY: erythritol; GLY: glycerol; FA: formic acid; DHA: dihydroxyacetone; HA: hydroxyacetone.

[c] 300 mg of each catalyst.

60 Figure S.8 shows the results obtained for reusability tests of 20Ni-10W/AG<sub>850</sub>.

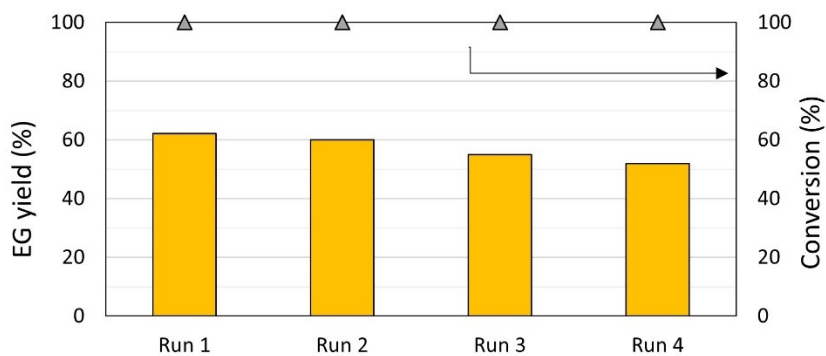

61

62 *Figure S.8 – Reusability tests of 20Ni-10W/AG<sub>850</sub>. Reaction conditions: 750 mg ball-milled cellulose, 300*  
63 *mg 20Ni-10W/AG<sub>850</sub>, 300 mL H<sub>2</sub>O, 205 °C, 50 bar H<sub>2</sub>, 300 rpm, 5 h.*

64
